# Supplementary material
Source: PubMed Central journal article supplement (PMC11470306)
Supplement: ajtr0016-4549-f6.pdf [file ajtr0016-4549-f6.pdf]

## Jiannao pills for chronic restraint stress-induced anxiety

**Supplementary Table 1.** The mobile phase parameters in ultra-high performance liquid chromatography (UHPLC) experiments

| Time (min) | Flow rate (mL/min) | Phase A: water (%) | Phase B: acetonitrile (%) |
|------------|--------------------|--------------------|---------------------------|
| 0          | 400                | 95                 | 5                         |
| 3.5        | 400                | 85                 | 15                        |
| 6          | 400                | 70                 | 30                        |
| 6.5        | 400                | 70                 | 30                        |
| 12         | 400                | 30                 | 70                        |
| 12.5       | 400                | 30                 | 70                        |
| 18         | 400                | 0                  | 100                       |
| 22         | 400                | 0                  | 100                       |
| 25         | 400                | 0                  | 100                       |
| 26         | 400                | 95                 | 5                         |
| 30         | 400                | 95                 | 5                         |

**Supplementary Table 2.** Analysis of the chemical compositions of Jiannao pills under the positive electrospray ionization mode

| ID | NameEN                                                                                                                                                                                    | Formula                                         | Mzmed    | Rtmed    |
|----|-------------------------------------------------------------------------------------------------------------------------------------------------------------------------------------------|-------------------------------------------------|----------|----------|
| 1  | (1R,2E,7R,10E,12S,13S,15R)-12,15-dihydroxy-7-methyl-8-oxabicyclo[11.3.0]hexadeca-2,10-dien-9-one                                                                                          | C <sub>16</sub> H <sub>24</sub> O <sub>4</sub>  | 319.1304 | 755.149  |
| 2  | (1R,2R,5S,8R,14R,15R,16S)-16-hydroxy-1,2,14,17,17-pentamethyl-8-(prop-1-en-2-yl)pentacyclo[11.7.0.0 <sup>2,10</sup> .0 <sup>5,9</sup> .0 <sup>14,18</sup> ]icosane-5,15-dicarboxylic acid | C <sub>30</sub> H <sub>46</sub> O <sub>5</sub>  | 504.3676 | 903.9535 |
| 3  | (1r,3R,4s,5S)-4-(((2E)-3-(3,4-Dihydroxyphenyl)-2-propenoyl)oxy)-1,3,5-trihydroxycyclohexanecarboxylic acid                                                                                | C <sub>16</sub> H <sub>18</sub> O <sub>9</sub>  | 377.0848 | 186.528  |
| 4  | (2S,3R,4R,5R,6S)-2-((2R,3R,4S,5R,6R)-2-[2-(3,4-dihydroxyphenyl)ethoxy]-3,5-dihydroxy-6-(hydroxymethyl)oxan-4-yl]oxy-6-methyloxane-3,4,5-triol                                             | C <sub>20</sub> H <sub>30</sub> O <sub>12</sub> | 485.162  | 144.59   |
| 5  | (2Z)-6-hydroxy-2-((4-hydroxy-3-methoxyphenyl)methylidene)-1-benzofuran-3-one                                                                                                              | C <sub>16</sub> H <sub>12</sub> O <sub>5</sub>  | 285.0753 | 1791.16  |
| 6  | (S)-[10]-Gingerol                                                                                                                                                                         | C <sub>21</sub> H <sub>34</sub> O <sub>4</sub>  | 351.2523 | 619.37   |
| 7  | 1-Hydroxyepiacorone                                                                                                                                                                       | C <sub>15</sub> H <sub>24</sub> O <sub>3</sub>  | 253.1797 | 373.999  |
| 8  | 2-(2-oxo-8,9-dihydrofuro[2,3-h]chromen-8-yl)propan-2-yl acetate                                                                                                                           | C <sub>16</sub> H <sub>16</sub> O <sub>5</sub>  | 306.1327 | 397.468  |
| 9  | 2-(Methoxycarbonyl)-5-methyl-2,4-bis(3-methyl-2-butenyl)-6-(2-methyl-1-oxopropyl)-5-(4-methyl-3-pentenyl)cyclohexanone                                                                    | C <sub>29</sub> H <sub>46</sub> O <sub>4</sub>  | 459.3472 | 630.22   |
| 10 | 2-Acetyl-5-methylpyridine                                                                                                                                                                 | C <sub>8</sub> H <sub>9</sub> NO                | 136.0757 | 274.106  |
| 11 | 2-Aminoacetophenone                                                                                                                                                                       | C <sub>8</sub> H <sub>9</sub> NO                | 136.0754 | 52.5511  |
| 12 | 2-Furoic acid                                                                                                                                                                             | C <sub>5</sub> H <sub>4</sub> O <sub>3</sub>    | 113.0233 | 57.8203  |
| 13 | 2-Oxovaleric acid                                                                                                                                                                         | C <sub>5</sub> H <sub>8</sub> O <sub>3</sub>    | 117.0544 | 44.4966  |
| 14 | 2,8-Dihydroxy-5,5,8-trimethyl-11-oxatetracyclo[7.3.1.0~1,9~.0~3,7~]tridecan-10-one                                                                                                        | C <sub>15</sub> H <sub>22</sub> O <sub>4</sub>  | 289.1392 | 44.182   |
| 15 | 3-Feruloyl-1,5-quinolactone                                                                                                                                                               | C <sub>17</sub> H <sub>18</sub> O <sub>8</sub>  | 351.108  | 493.505  |
| 16 | 3-Hydroxyurs-12-en-23-oic acid                                                                                                                                                            | C <sub>30</sub> H <sub>48</sub> O <sub>3</sub>  | 479.3507 | 1019.905 |
| 17 | 4-[4-(3,4-dihydroxyphenyl)-2,3-dimethylbutyl]benzene-1,2-diol                                                                                                                             | C <sub>18</sub> H <sub>22</sub> O <sub>4</sub>  | 325.1415 | 601.041  |

Giannao pills for chronic restraint stress-induced anxiety

|    |                                                                                                                                  |                      |          |          |
|----|----------------------------------------------------------------------------------------------------------------------------------|----------------------|----------|----------|
| 18 | 4-Methylumbelliferone                                                                                                            | $C_{10}H_8O_3$       | 194.0808 | 58.8171  |
| 19 | 4,4,8,10,14-pentamethyl-17-(4,5,6-trihydroxy-6-methylheptan-2-yl)-2,5,6,7,9,15-hexahydro-1H-cyclopenta[a]phenanthrene-3,16-dione | $C_{30}H_{46}O_5$    | 469.3321 | 894.073  |
| 20 | 5-O-Methylvisammioside                                                                                                           | $C_{22}H_{28}O_{10}$ | 453.1754 | 618.911  |
| 21 | 7-methoxy-4-methylcoumarin                                                                                                       | $C_{11}H_{10}O_3$    | 191.0704 | 280.182  |
| 22 | Acetophenone                                                                                                                     | $C_8H_8O$            | 121.0648 | 275.703  |
| 23 | Adenine                                                                                                                          | $C_5H_5N_5$          | 136.0616 | 43.8439  |
| 24 | Alpha-Methoxy-1H-indole-3-propanoic acid                                                                                         | $C_{12}H_{13}NO_3$   | 220.0965 | 219.866  |
| 25 | Apigenin                                                                                                                         | $C_{15}H_{10}O_5$    | 271.0601 | 863.069  |
| 26 | Arecaidine                                                                                                                       | $C_7H_{11}NO_2$      | 142.0861 | 86.5438  |
| 27 | Armillarilin                                                                                                                     | $C_{24}H_{30}O_7$    | 431.2068 | 694.335  |
| 28 | Benzaldehyde                                                                                                                     | $C_7H_6O$            | 107.049  | 58.8171  |
| 29 | CHOLIC ACID                                                                                                                      | $C_{24}H_{40}O_5$    | 447.2518 | 914.806  |
| 30 | Colubrinic acid                                                                                                                  | $C_{30}H_{46}O_4$    | 453.3361 | 583.902  |
| 31 | Curcumenol                                                                                                                       | $C_{15}H_{22}O_2$    | 257.1515 | 584.6185 |
| 32 | dehydrocostus lactone                                                                                                            | $C_{15}H_{18}O_2$    | 248.1646 | 402.903  |
| 33 | Deoxyvasicinone                                                                                                                  | $C_{11}H_{10}N_2O$   | 187.0864 | 289.183  |
| 34 | Dulciol C                                                                                                                        | $C_{28}H_{34}O_7$    | 483.238  | 710.8175 |
| 35 | Emodin                                                                                                                           | $C_{15}H_{10}O_5$    | 271.0601 | 497.016  |
| 36 | Ent-16a-Hydroxy-17-acetoxy-19-kauranal                                                                                           | $C_{22}H_{34}O_4$    | 363.2511 | 783.445  |
| 37 | Eudesmin                                                                                                                         | $C_{22}H_{26}O_6$    | 409.1627 | 783.2875 |
| 38 | Furocoumarinic acid glucoside                                                                                                    | $C_{17}H_{18}O_9$    | 367.1018 | 420.923  |
| 39 | Gamma-L-Glutamyl-L-pipecolic acid                                                                                                | $C_{11}H_{18}N_2O_5$ | 259.1302 | 512.518  |
| 40 | Ganoderic acid Y                                                                                                                 | $C_{30}H_{46}O_3$    | 455.3524 | 949.123  |
| 41 | Ganoderol A                                                                                                                      | $C_{30}H_{46}O_2$    | 439.3568 | 890.32   |
| 42 | Ginkgolic acid (C13:0)                                                                                                           | $C_{20}H_{32}O_3$    | 321.24   | 865.137  |
| 43 | INDOLE-3-ETHANOL                                                                                                                 | $C_{10}H_{11}NO$     | 162.0913 | 172.112  |
| 44 | Indoleacetic acid                                                                                                                | $C_{10}H_9NO_2$      | 176.0703 | 302.03   |
| 45 | Kaempferol                                                                                                                       | $C_{15}H_{10}O_6$    | 287.0554 | 447.863  |
| 46 | Kaempferol-3-O-beta-glucopyranosyl-7-O-alpha-rhamnopyranoside                                                                    | $C_{27}H_{30}O_{15}$ | 595.1657 | 363.62   |
| 47 | KOBUSONE                                                                                                                         | $C_{14}H_{22}O_2$    | 245.1509 | 648.209  |
| 48 | L-Gulose                                                                                                                         | $C_6H_{12}O_6$       | 203.0523 | 39.79025 |
| 49 | L-Tyrosine                                                                                                                       | $C_9H_{11}NO_3$      | 182.0808 | 51.9955  |
| 50 | Laurelliptine                                                                                                                    | $C_{18}H_{19}NO_4$   | 314.138  | 222.094  |
| 51 | Lycorine                                                                                                                         | $C_{16}H_{17}NO_4$   | 288.1224 | 148.599  |
| 52 | Mannitol                                                                                                                         | $C_6H_{14}O_6$       | 205.0684 | 34.5347  |
| 53 | monolinolein                                                                                                                     | $C_{21}H_{38}O_4$    | 393.2397 | 889.803  |
| 54 | N-(p-Hydroxyphenyl)ethyl p-hydroxycinnamide                                                                                      | $C_{17}H_{17}NO_3$   | 284.1286 | 207.267  |
| 55 | N-Feruloylglycyl-L-phenylalanine                                                                                                 | $C_{21}H_{22}N_2O_6$ | 399.1527 | 409.486  |
| 56 | Neobavaisoflavone                                                                                                                | $C_{20}H_{18}O_4$    | 323.1257 | 618.605  |
| 57 | Nicotinic acid                                                                                                                   | $C_6H_5NO_2$         | 124.0393 | 101.329  |
| 58 | Norharman                                                                                                                        | $C_{11}H_8N_2$       | 169.0758 | 256.746  |
| 59 | Norisoboldine                                                                                                                    | $C_{18}H_{19}NO_4$   | 314.1363 | 500.748  |
| 60 | Phytolaccinic acid                                                                                                               | $C_{31}H_{48}O_6$    | 517.3511 | 1026.33  |

## Jiannao pills for chronic restraint stress-induced anxiety

|    |                                          |                    |          |          |
|----|------------------------------------------|--------------------|----------|----------|
| 61 | Pyrrole-2-carboxylic acid; LC-tDDA; CE10 | $C_5H_5NO_2$       | 112.0393 | 189.265  |
| 62 | Rhaponticin                              | $C_{21}H_{24}O_9$  | 421.1467 | 514.613  |
| 63 | Seneciphylline                           | $C_{18}H_{23}NO_5$ | 334.1652 | 147.91   |
| 64 | Tazettine                                | $C_{18}H_{21}NO_5$ | 332.1489 | 135.102  |
| 65 | Tulipinolide                             | $C_{17}H_{22}O_4$  | 291.157  | 380.942  |
| 66 | Venoterpine                              | $C_9H_{11}N_0$     | 150.0912 | 60.4652  |
| 67 | Wogonin                                  | $C_{16}H_{12}O_5$  | 285.0753 | 1661.37  |
| 68 | Zoapatanol                               | $C_{20}H_{34}O_4$  | 339.2514 | 737.5955 |

**Supplementary Table 3.** Analysis of the chemical compositions of Jiannao pills under the negative electrospray ionization mode

| ID | NameEN                                                         | Formula              | Mzmed    | Rtmed   |
|----|----------------------------------------------------------------|----------------------|----------|---------|
| 1  | 2-Acetylpyrrole                                                | $C_6H_7NO$           | 108.0455 | 108.136 |
| 2  | 3,4-di-O-caffeoylquinic acid                                   | $C_{25}H_{24}O_{12}$ | 515.1196 | 370.547 |
| 3  | 3,4,5-trimethoxycinnamic acid                                  | $C_{12}H_{14}O_5$    | 237.0763 | 432.601 |
| 4  | Asiatic acid                                                   | $C_{30}H_{48}O_5$    | 487.3415 | 1024.52 |
| 5  | Baicalein                                                      | $C_{15}H_{10}O_5$    | 269.0448 | 496.536 |
| 6  | Dehydrotumulosic acid                                          | $C_{31}H_{48}O_4$    | 483.3465 | 990.458 |
| 7  | Genistein                                                      | $C_{15}H_{10}O_5$    | 269.0448 | 539.794 |
| 8  | Isokobusone                                                    | $C_{14}H_{22}O_2$    | 221.1546 | 768.113 |
| 9  | Oleanoic Acid                                                  | $C_{30}H_{48}O_3$    | 455.3536 | 1356.22 |
| 10 | Oleic acid                                                     | $C_{18}H_{34}O_2$    | 281.2482 | 1025.49 |
| 11 | p-Aminobenzoic acid                                            | $C_7H_7NO_2$         | 136.0402 | 166.205 |
| 12 | p-coumaric acid methyl ester geometric isomer (tentative, MSe) | $C_9H_8O_3$          | 163.0402 | 279.681 |
| 13 | p-Hydroxybenzaldehyde                                          | $C_7H_6O_2$          | 121.0295 | 221.131 |
| 14 | Parishin E                                                     | $C_{19}H_{24}O_{13}$ | 459.1145 | 170.166 |
| 15 | Pelargonidin-3-O-glucoside                                     | $C_{21}H_{21}O_{10}$ | 431.0984 | 384.642 |
| 16 | Podocarpusflavone A                                            | $C_{31}H_{20}O_{10}$ | 551.0969 | 649.425 |
| 17 | Pyrocatechol                                                   | $C_6H_6O_2$          | 109.0295 | 94.5063 |
| 18 | Sibiricose A5                                                  | $C_{22}H_{30}O_{14}$ | 517.1567 | 206.918 |

# Giannao pills for chronic restraint stress-induced anxiety

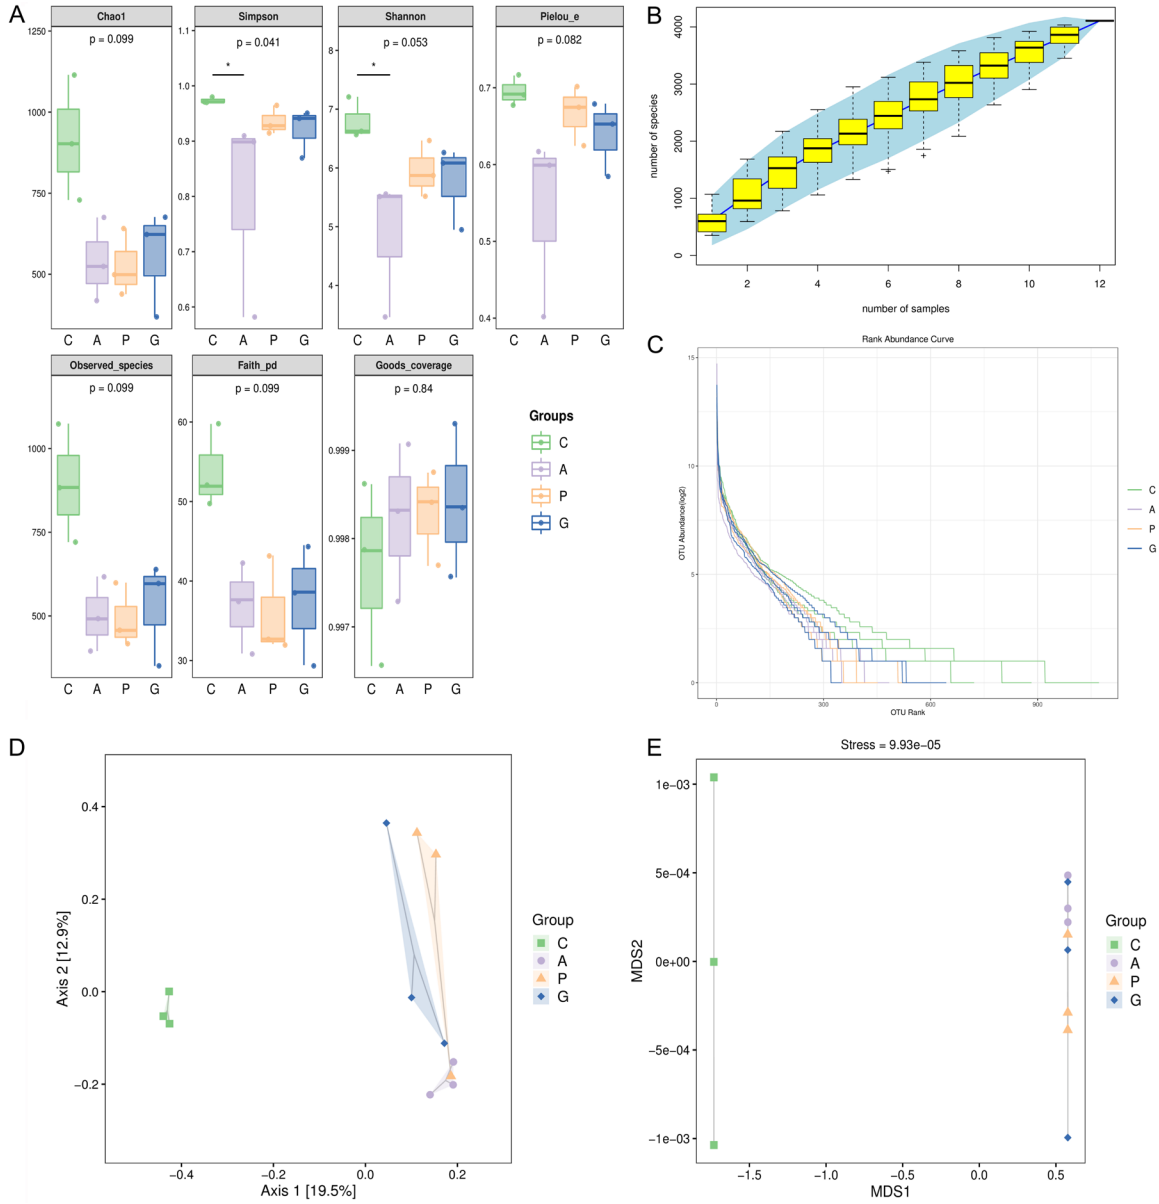

**Supplementary Figure 1.** Analysis of the diversity of intestinal microflora species of mice in each group. A. Group box diagram of alpha diversity index; B. Specaccum species accumulation curve; C. The curve of the abundance grade; D. The two-dimensional diagram of the principal coordinate analysis (PCoA); E. The two-dimensional diagram of the nonmetric multidimensional scaling (NMDS) analysis. C, Control group; A, Anxiety model group; G, Jiannao pills treatment group; P, Positive control group. \* $P < 0.05$  when compared to group C.

## Giannao pills for chronic restraint stress-induced anxiety

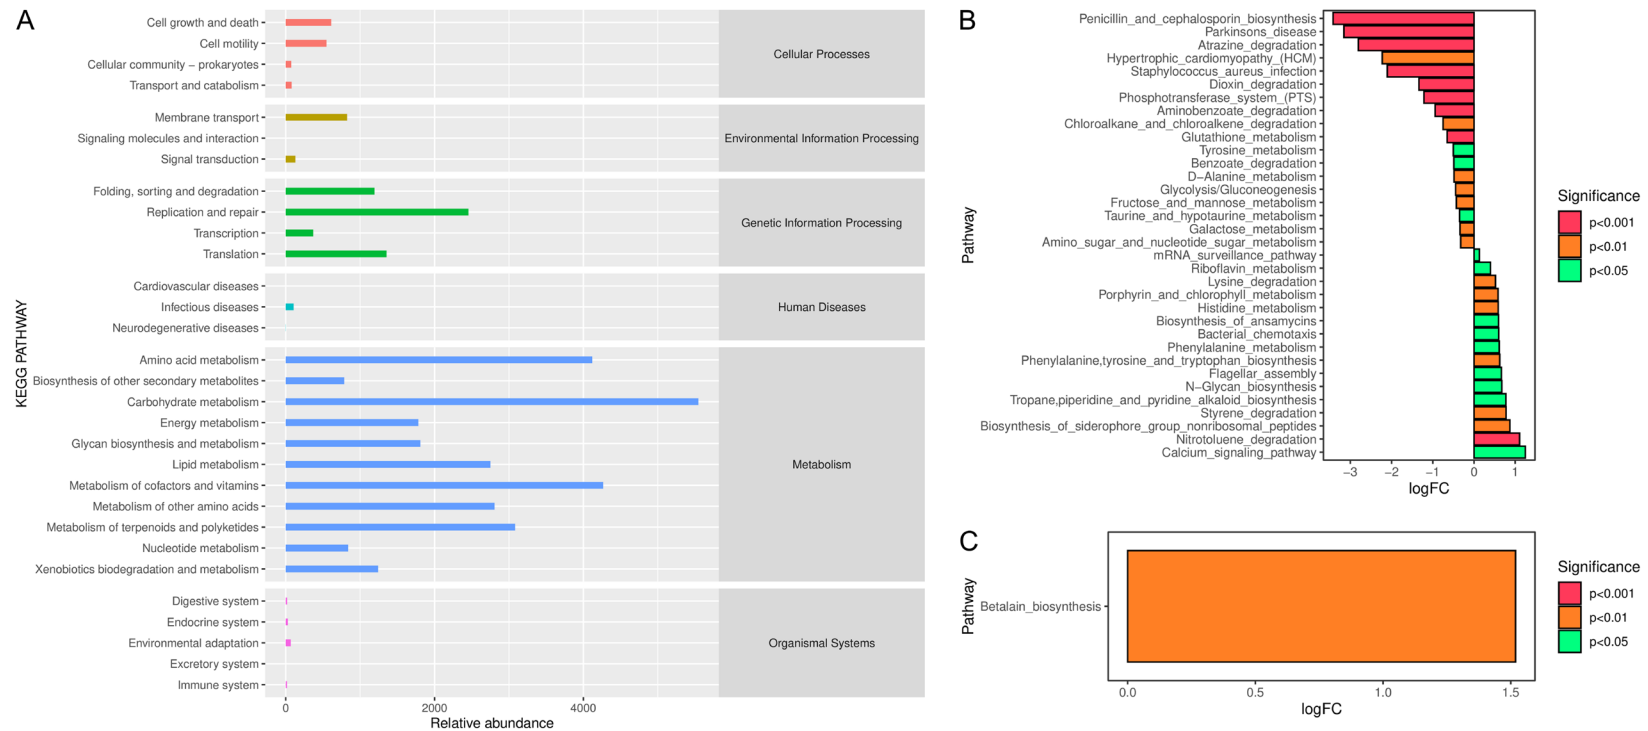

**Supplementary Figure 2.** Intestinal microflora function analysis of mice in each group. A. The diagram of the abundance of the secondary functional pathways by Kyoto Encyclopedia of Genes and Genomes (KEGG) analysis; B. The difference of KEGG metabolic pathway between group C and group A; C. The difference in KEGG metabolic pathway between group A and group G. C, Control group; A, Anxiety model group; G, Jiannao pills treatment group; P, Positive control group.
